# Supplementary material for: Outcomes of Different Haploidentical Transplantation Strategies from the Taiwan Blood and Marrow Transplantation Registry
Source: MDPI journal article supplement (doi:10.3390/cancers14041097), 2022-02-21
Supplement: s1 [file s1]

# Outcomes of different haploidentical transplantation strategies from the Taiwan Blood and Marrow Transplantation Registry

Xavier Cheng-Hong Tsai,<sup>1,2,3</sup> Tzu-Ting Chen,<sup>4</sup> Jyh-Pyng Gau,<sup>5</sup> Po-Nan Wang,<sup>6</sup> Yi-Chang Liu,<sup>7,8</sup> Ming-Yu Lien,<sup>4</sup> Chi-Cheng Li,<sup>9,10</sup> Ming Yao,<sup>1,3</sup> Bor-Sheng Ko<sup>1,3</sup>

<sup>1</sup>Division of Hematology, Department of Internal Medicine, National Taiwan University Hospital, Taipei, Taiwan

<sup>2</sup>Genome and Systems Biology Degree Program, National Taiwan University, Taipei, Taiwan

<sup>3</sup>Department of Hematological Oncology, National Taiwan University Cancer Center, Taipei, Taiwan

<sup>4</sup>Division of Hematology and Oncology, Department of Medicine, China Medical University Hospital, Taichung, Taiwan

<sup>5</sup>Division of Hematology, Department of Medicine, Taipei Veterans General Hospital, Taipei, Taiwan

<sup>6</sup>Division of Hematology, Department of Internal Medicine, Chang Gung Medical Foundation, Linkou Branch, Taoyuan, Taiwan

<sup>7</sup>Division of Hematology-Oncology, Department of Internal Medicine, Kaohsiung Medical University Hospital, Kaohsiung, Taiwan

<sup>8</sup>College of Medicine, Kaohsiung Medical University, Kaohsiung, Taiwan

<sup>9</sup>Tai-Cheng Cell Therapy Center, National Taiwan University, Taiwan

<sup>10</sup>Department of Hematology and Oncology, Buddhist Tzu-Chi General Hospital, Hualien, Taiwan.

|                                          |          |
|------------------------------------------|----------|
| <b>Supplementary Table .....</b>         | <b>2</b> |
| <b>Supplementary Figure Legend .....</b> | <b>4</b> |
| <b>Supplementary Figures.....</b>        | <b>5</b> |

**Supplementary Table S1. Post hoc test for CD34 dose**

|                                    | Mean difference | Std. Error | P value |
|------------------------------------|-----------------|------------|---------|
| mGIAC vs PTCy with ATG             | -2.51           | 0.56       | <0.001  |
| mGIAC vs PTCy without ATG          | -3.39           | 0.67       | <0.001  |
| PTCy with ATG vs. PTCy without ATG | -0.87           | 0.76       | 0.489   |

Abbreviations: ATG, anti-thymocyte globulin

**Supplementary Table S2. Comparison of clinical characteristics among patients with different haplo-HSCT approaches after propensity-score matching**

| Variables                                           | Total<br>(n = 129) | Modified GIAC<br>(n = 86, 66.7%) | PTCy without ATG<br>(n = 16, 12.4%) | PTCy with ATG<br>(n = 27, 20.9%) | P value |
|-----------------------------------------------------|--------------------|----------------------------------|-------------------------------------|----------------------------------|---------|
| <b>Sex</b> <sup>α</sup>                             |                    |                                  |                                     |                                  | 0.341   |
| Male                                                | 62 (48.1%)         | 40 (46.5%)                       | 6 (37.5%)                           | 16 (59.3%)                       |         |
| Female                                              | 67 (51.9%)         | 46 (53.5%)                       | 10 (62.5%)                          | 11 (40.7%)                       |         |
| <b>Age, years</b> <sup>β</sup>                      | 42.1 (18.7-69.2)   | 42.0 (18.7-69.2)                 | 42.0 (21.8-63.7)                    | 44.9 (18.9-68.3)                 | 0.700   |
| <b>Disease</b> <sup>α</sup>                         |                    |                                  |                                     |                                  |         |
| AML                                                 | 70 (54.3%)         | 51 (59.3%)                       | 5 (31.3%)                           | 14 (51.9%)                       | 0.113   |
| MDS                                                 | 9 (7.0%)           | 7 (8.1%)                         | 0 (0%)                              | 2 (7.4%)                         | 0.500   |
| MDS/MPN                                             | 4 (3.1%)           | 1 (1.2%)                         | 2 (12.5%)                           | 1 (3.7%)                         | 0.055   |
| ALL                                                 | 26 (20.2%)         | 18 (20.9%)                       | 3 (18.8%)                           | 5 (18.5%)                        | 0.953   |
| MPAL                                                | 2 (1.6%)           | 2 (2.3%)                         | 0 (0%)                              | 0 (0%)                           | 0.602   |
| CML                                                 | 4 (3.1%)           | 1 (1.2%)                         | 1 (6.3%)                            | 2 (7.4%)                         | 0.195   |
| NHL                                                 | 10 (7.8%)          | 3 (3.5%)                         | 5 (31.3%)                           | 2 (7.4%)                         | 0.001   |
| HL                                                  | 3 (2.3%)           | 2 (2.3%)                         | 0 (0%)                              | 1 (3.7%)                         | 0.738   |
| Myeloma                                             | 1 (0.8%)           | 1 (1.2%)                         | 0 (0%)                              | 0 (0%)                           | 0.777   |
| <b>Conditioning</b> <sup>α</sup>                    |                    |                                  |                                     |                                  | 0.833   |
| Myeloablative                                       | 28 (21.7%)         | 20 (23.3%)                       | 3 (18.8%)                           | 5 (18.5%)                        |         |
| Reduced intensity                                   | 101 (78.3%)        | 66 (76.7%)                       | 13 (81.3%)                          | 22 (81.5%)                       |         |
| <b>ATG dose per kilogram</b> <sup>γ</sup>           | 6.0 (2.0-7.5)      | 6.0 (5.0-7.5)                    | 0                                   | 4.0 (2.0-7.5)                    | <0.001  |
| <b>Stem cell source</b> <sup>α</sup>                |                    |                                  |                                     |                                  | <0.001  |
| BM + mobilized PB                                   | 86 (66.7%)         | 86 (100%)                        | 0 (0%)                              | 0 (0%)                           |         |
| Mobilized PB                                        | 43 (33.3%)         | 0 (0%)                           | 16 (100%)                           | 27 (100%)                        |         |
| <b>Donor relationship</b> <sup>α</sup>              |                    |                                  |                                     |                                  | 0.584   |
| Child                                               | 53 (41.1%)         | 35 (40.7%)                       | 7 (43.8%)                           | 11 (40.7%)                       |         |
| Parent                                              | 37 (28.7%)         | 27 (31.4%)                       | 2 (12.5%)                           | 8 (29.6%)                        |         |
| Sibling                                             | 39 (30.2%)         | 7 (27.9%)                        | 7 (43.8%)                           | 8 (29.6%)                        |         |
| <b>Donor-recipient sex combination</b> <sup>α</sup> |                    |                                  |                                     |                                  | 0.736   |
| Female donor to male recipient                      | 33 (25.6%)         | 22 (25.6%)                       | 3 (18.8%)                           | 8 (29.6%)                        |         |
| Other combinations                                  | 96 (74.4%)         | 64 (74.4%)                       | 13 (81.2%)                          | 19 (70.4%)                       |         |
| <b>Recipient CMV serostatus</b> <sup>αδ</sup>       |                    |                                  |                                     |                                  | 0.898   |
| Negative                                            | 11 (8.5%)          | 8 (9.3%)                         | 1 (9.1%)                            | 2 (18.2%)                        |         |
| Positive                                            | 118 (91.5%)        | 78 (90.7%)                       | 15 (93.8%)                          | 25 (92.6%)                       |         |
| Missing                                             | 1 (0.8%)           | 0 (0%)                           | 0 (0%)                              | 1 (3.7%)                         |         |
| <b>CD34 (10<sup>6</sup>/kg)</b> <sup>ve</sup>       | 5.1 (1.3-21.2)     | 5.0 (2.4-8.3)                    | 5.3 (3.0-13.5)                      | 5.9 (1.3-21.2)                   |         |
| <b>Disease Risk Index</b> <sup>α</sup>              |                    |                                  |                                     |                                  | 0.136   |
| Low                                                 | 8 (6.2%)           | 5 (5.8%)                         | 0 (0%)                              | 3 (11.1%)                        |         |
| Intermediate                                        | 52 (40.3%)         | 32 (37.2%)                       | 6 (37.5%)                           | 14 (51.9%)                       |         |
| High                                                | 56 (43.4%)         | 40 (46.5%)                       | 10 (62.5%)                          | 5 (22.2%)                        |         |
| Very high                                           | 13 (10.1%)         | 9 (10.5%)                        | 0 (0%)                              | 4 (14.8%)                        |         |
| <b>Year of HSCT</b>                                 | 2016 (2011-2019)   | 2016 (2013-2019)                 | 2016 (2014-2019)                    | 2017 (2011-2019)                 |         |

Abbreviations: ALL, acute lymphoblastic leukemia; AML, acute myeloid leukemia; ATG, anti-thymocyte globulin; BM, bone marrow; CMV, cytomegalovirus; CR, complete remission; HL, Hodgkin lymphoma; MDS, myelodysplastic syndrome; MPAL, mixed phenotypic acute leukemia; NHL, non-Hodgkin lymphoma; PB, peripheral blood

α Number of patients (%)

β Mean (range)

γ Median (range)

δ Based on patients with available data

ε Combination of bone marrow and peripheral stem cell doses

### Supplementary Table S3. Causes of death among patients receiving different haplo-HSCT

#### strategies

| Cause of death           | Modified GIAC<br>(n = 110) | PTCy without ATG<br>(n = 26) | PTCy with ATG<br>(n = 42) | P value |
|--------------------------|----------------------------|------------------------------|---------------------------|---------|
| Overall                  | 54                         | 20                           | 23                        |         |
| Relapse                  | 32 (59.3%)                 | 10 (50%)                     | 12 (52.2%)                | 0.620   |
| Infection                | 12 (22.2%)                 | 5 (25%)                      | 8 (34.8%)                 | 0.309   |
| GvHD                     | 5 (9.3%)                   | 2 (10%)                      | 1 (4.3%)                  | 0.589   |
| Graft failure            | 2 (3.7%)                   | 2 (10%)                      | 0 (%)                     | 0.102   |
| Interstitial pneumonia   | 1 (1.9%)                   | 0 (%)                        | 1 (4.3%)                  | 0.625   |
| Intracerebral hemorrhage | 0 (0%)                     | 1 (5%)                       | 0 (0%)                    | 0.053   |
| Other                    | 2 (3.7%)                   | 0 (%)                        | 1 (4.3%)                  | 0.748   |

**Supplementary Figure S1.** Modified GIAC protocol for myeloablative conditioning (A) and reduced intensity conditioning (B).

**Supplementary Figure S2.** The outcome analyses of patients receiving haplo-HSCT after propensity score matching, including cumulative incidence of relapse (A), nonrelapse mortality (B), overall survival (C), and GvHD/relapse-free survival (D).

**Supplementary Figure S3.** (A) The univariate analysis of cumulative incidence of relapse (CIR) yielded that advanced disease status and grade III-IV acute GvHD were significant prognostic factors. (B) In the univariate analysis of nonrelapse mortality (NRM), the variables had no prognostic impact. (C) The univariate analysis of GvHD/relapse-free survival (GRFS) yielded advanced disease status, grade III-IV acute GvHD, and extensive chronic GvHD were significant prognostic factors. (D) The univariate analysis of overall survival (OS) yielded advanced disease status, grade III-IV acute GvHD, extensive chronic GvHD, stem cell source, and recipient CMV serostatus were significant prognostic factors.

**Supplementary Figure S4.** Comparison of nonrelapse mortality (A) and cumulative incidence of relapse (B) in patients with low/intermediate-risk diseases receiving haplo-HSCT.

**Supplementary Figure S5.** Comparison of cumulative incidence of relapse (A) and nonrelapse mortality (B) in patients with high/very-high-risk diseases receiving haplo-HSCT.

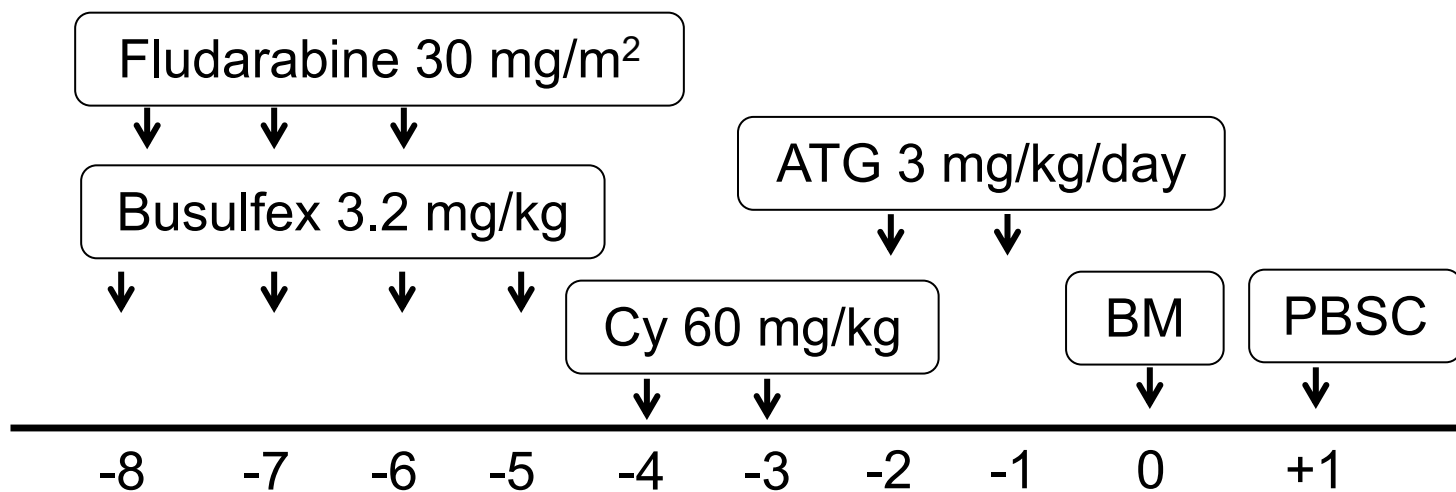

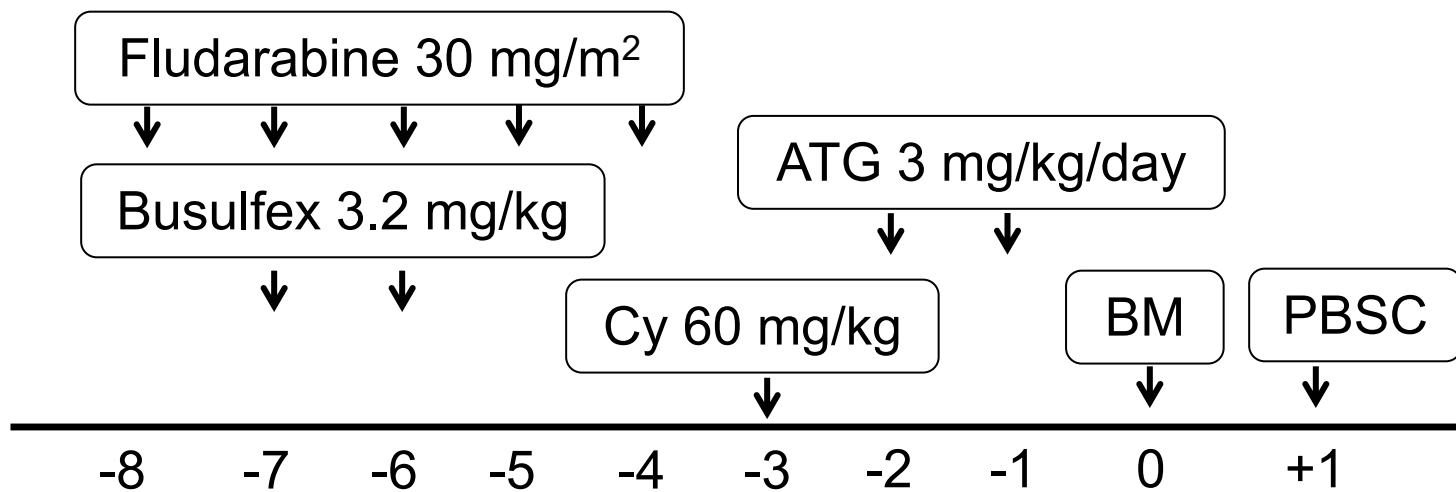

**Supplementary Figure S2A**  
**Propensity score matched**

**Cumulative Incidence of Relapse**

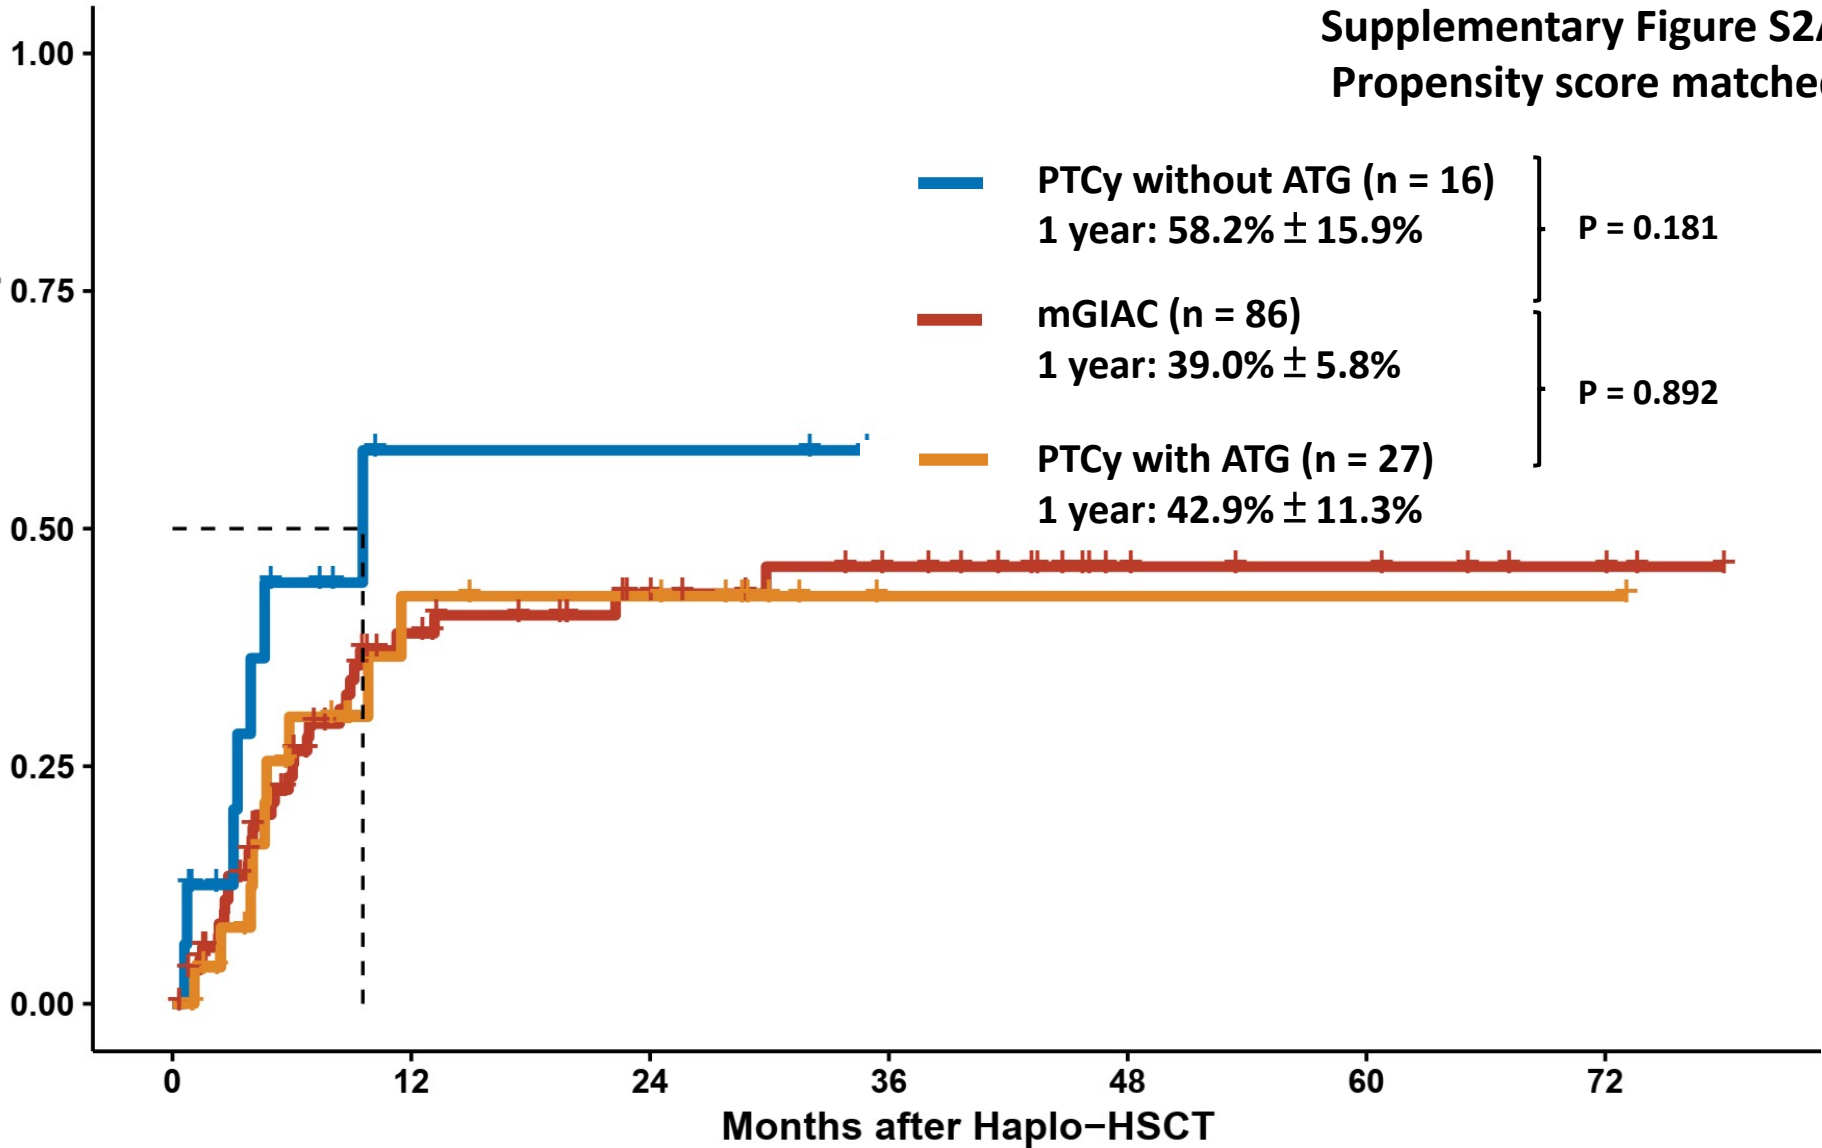

**No. at risk:**

|  |    |    |    |                |   |   |   |
|--|----|----|----|----------------|---|---|---|
|  | 86 | 34 | 23 | 17             | 8 | 6 | 3 |
|  | 16 | 2  | 2  | 0 <sub>7</sub> | 0 | 0 | 0 |
|  | 27 | 9  | 8  | 1              | 1 | 1 | 1 |

**Supplementary Figure S2B**  
**Propensity score matched**

**Probability of Non-relapse Mortality**

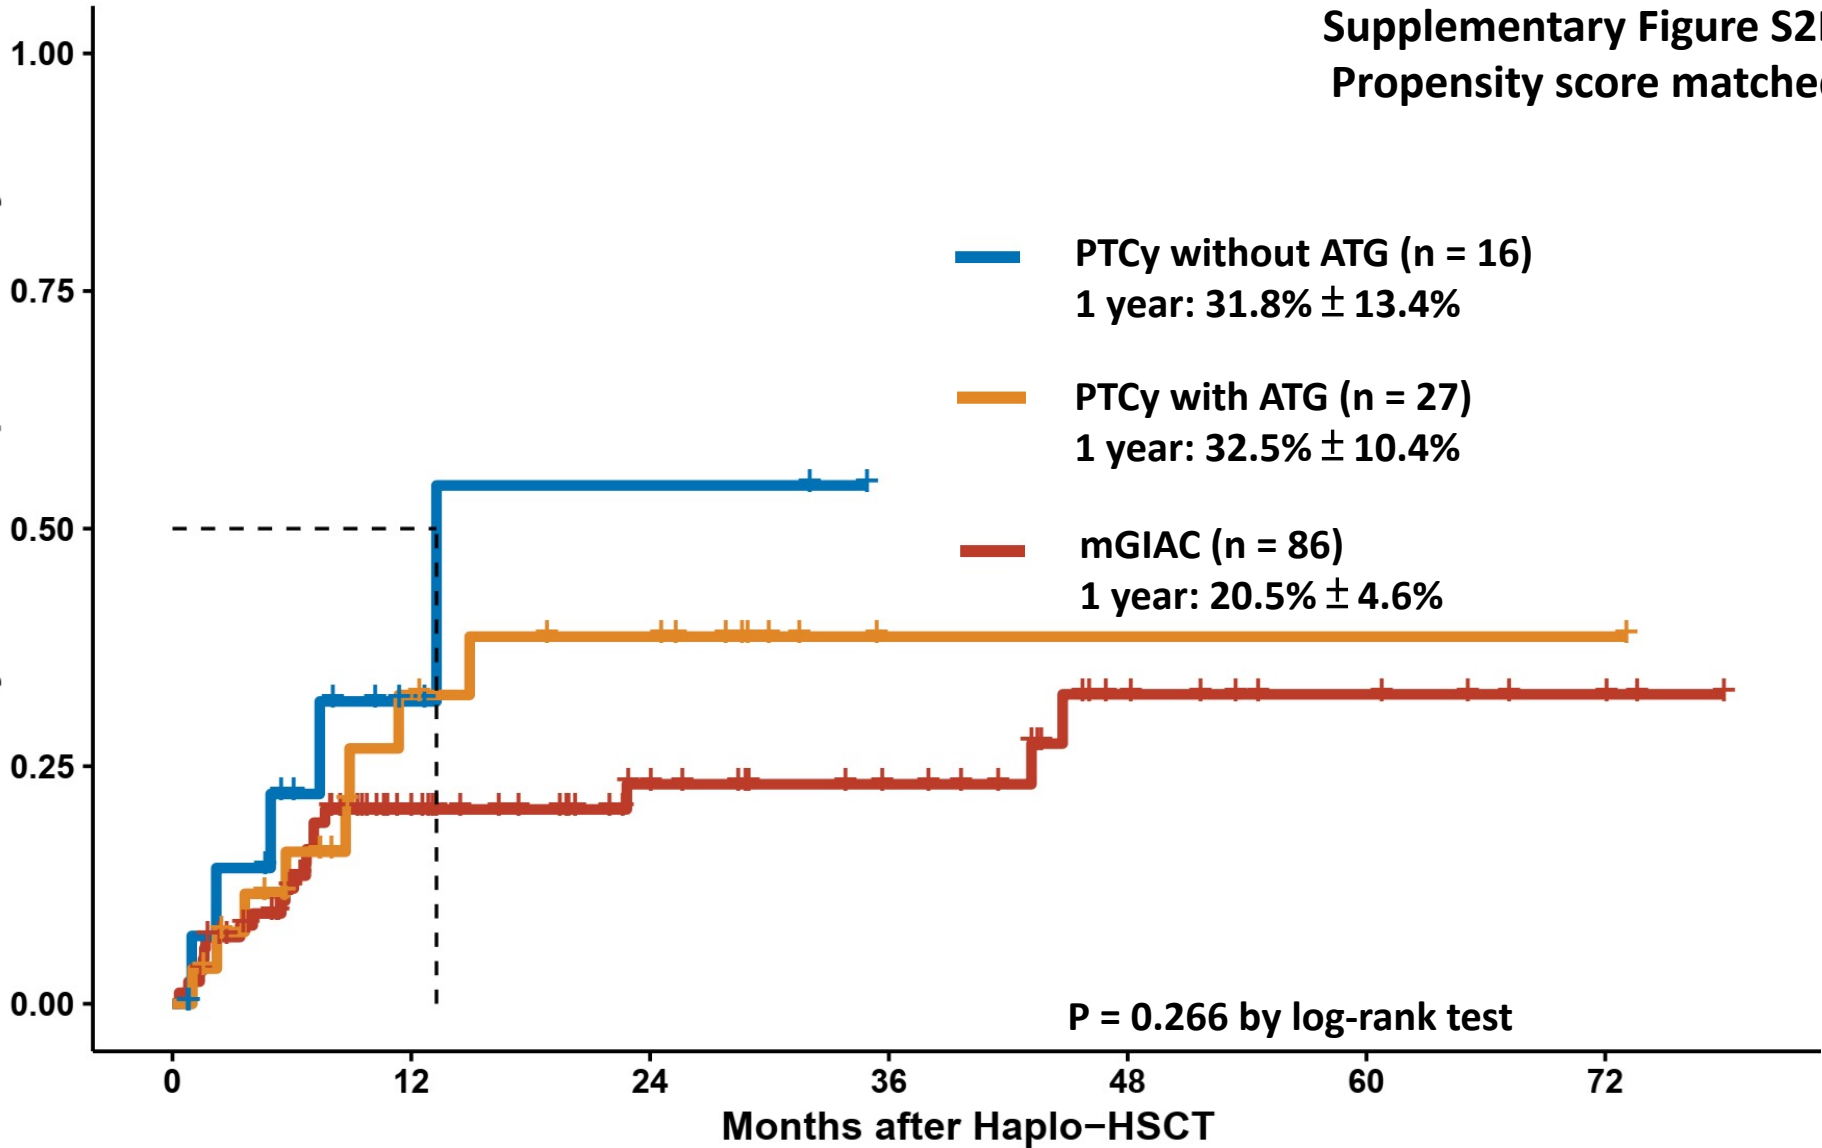

**No. at risk:**

|    |    |    |                |    |   |   |
|----|----|----|----------------|----|---|---|
| 86 | 45 | 28 | 21             | 10 | 6 | 3 |
| 16 | 4  | 2  | 0 <sub>8</sub> | 0  | 0 | 0 |
| 27 | 12 | 9  | 1              | 1  | 1 | 1 |



**Supplementary Figure S2C**  
**Propensity score matched**

Probability of Overall Survival

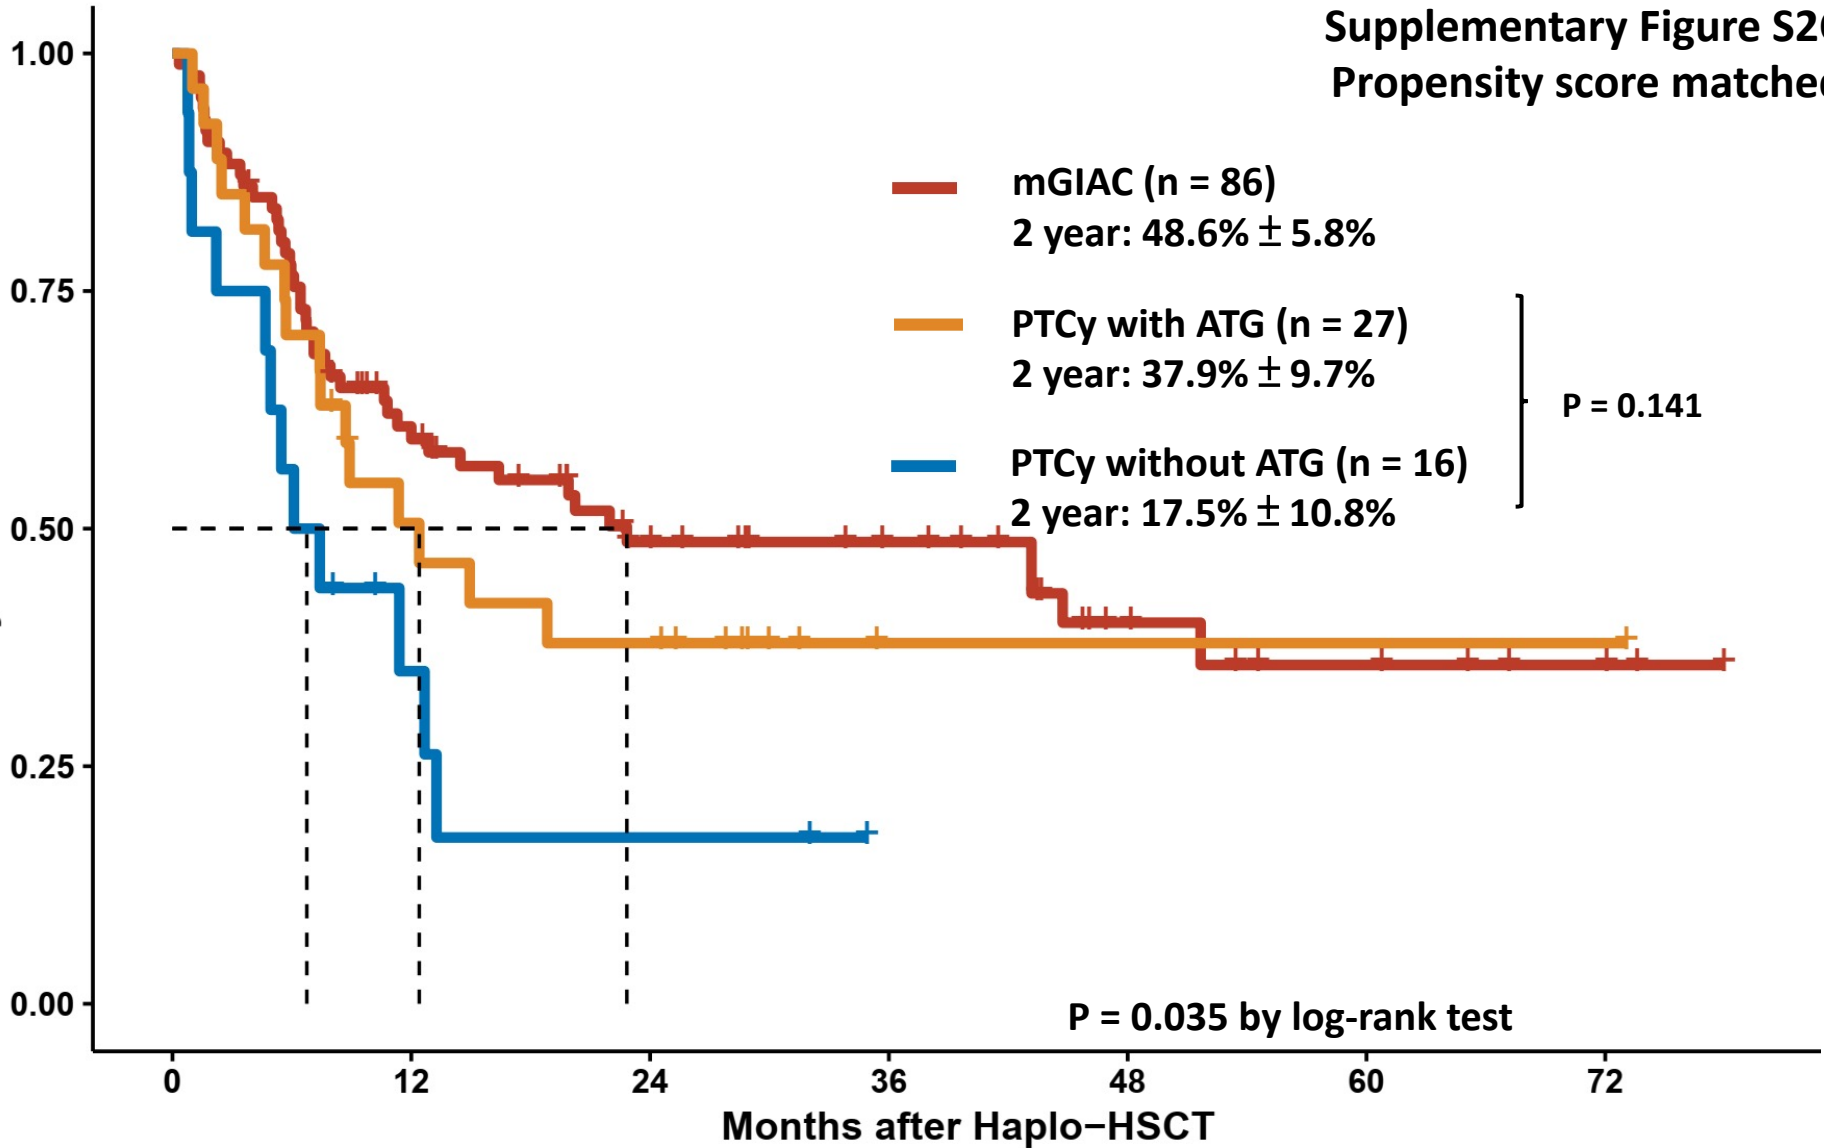

**No. at risk:**

|                                           |    |    |                |    |   |   |
|-------------------------------------------|----|----|----------------|----|---|---|
| <span style="color: #8B0000;">—</span> 86 | 45 | 28 | 21             | 10 | 6 | 3 |
| <span style="color: #0000FF;">—</span> 16 | 4  | 2  | 0 <sub>9</sub> | 0  | 0 | 0 |
| <span style="color: #FF8C00;">—</span> 27 | 12 | 9  | 1              | 1  | 1 | 1 |

**Supplementary Figure S2D**  
**Propensity score matched**

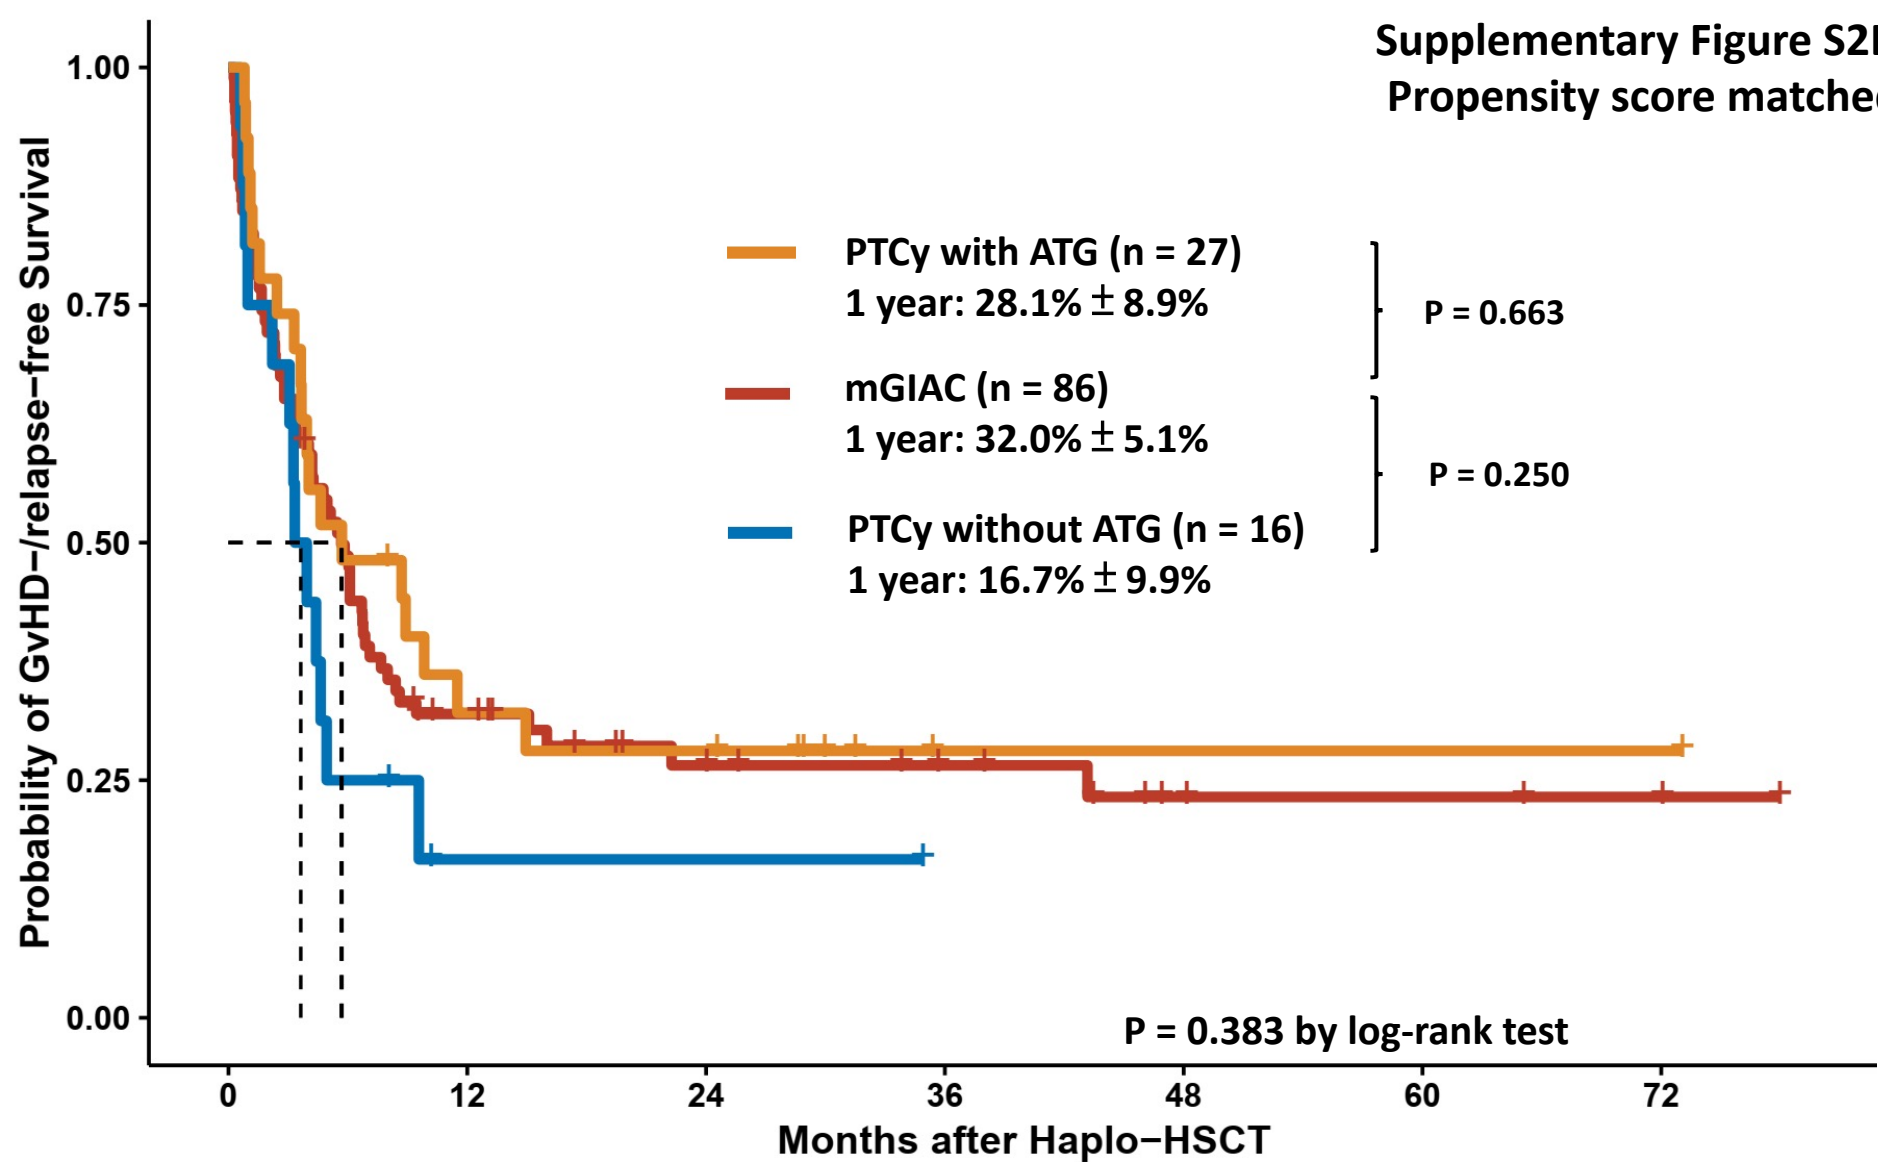

**No. at risk:**

|  |    |    |    |                 |   |   |   |
|--|----|----|----|-----------------|---|---|---|
|  | 86 | 22 | 13 | 9               | 4 | 3 | 2 |
|  | 16 | 1  | 1  | 0 <sub>10</sub> | 0 | 0 | 0 |
|  | 27 | 8  | 7  | 1               | 1 | 1 | 1 |

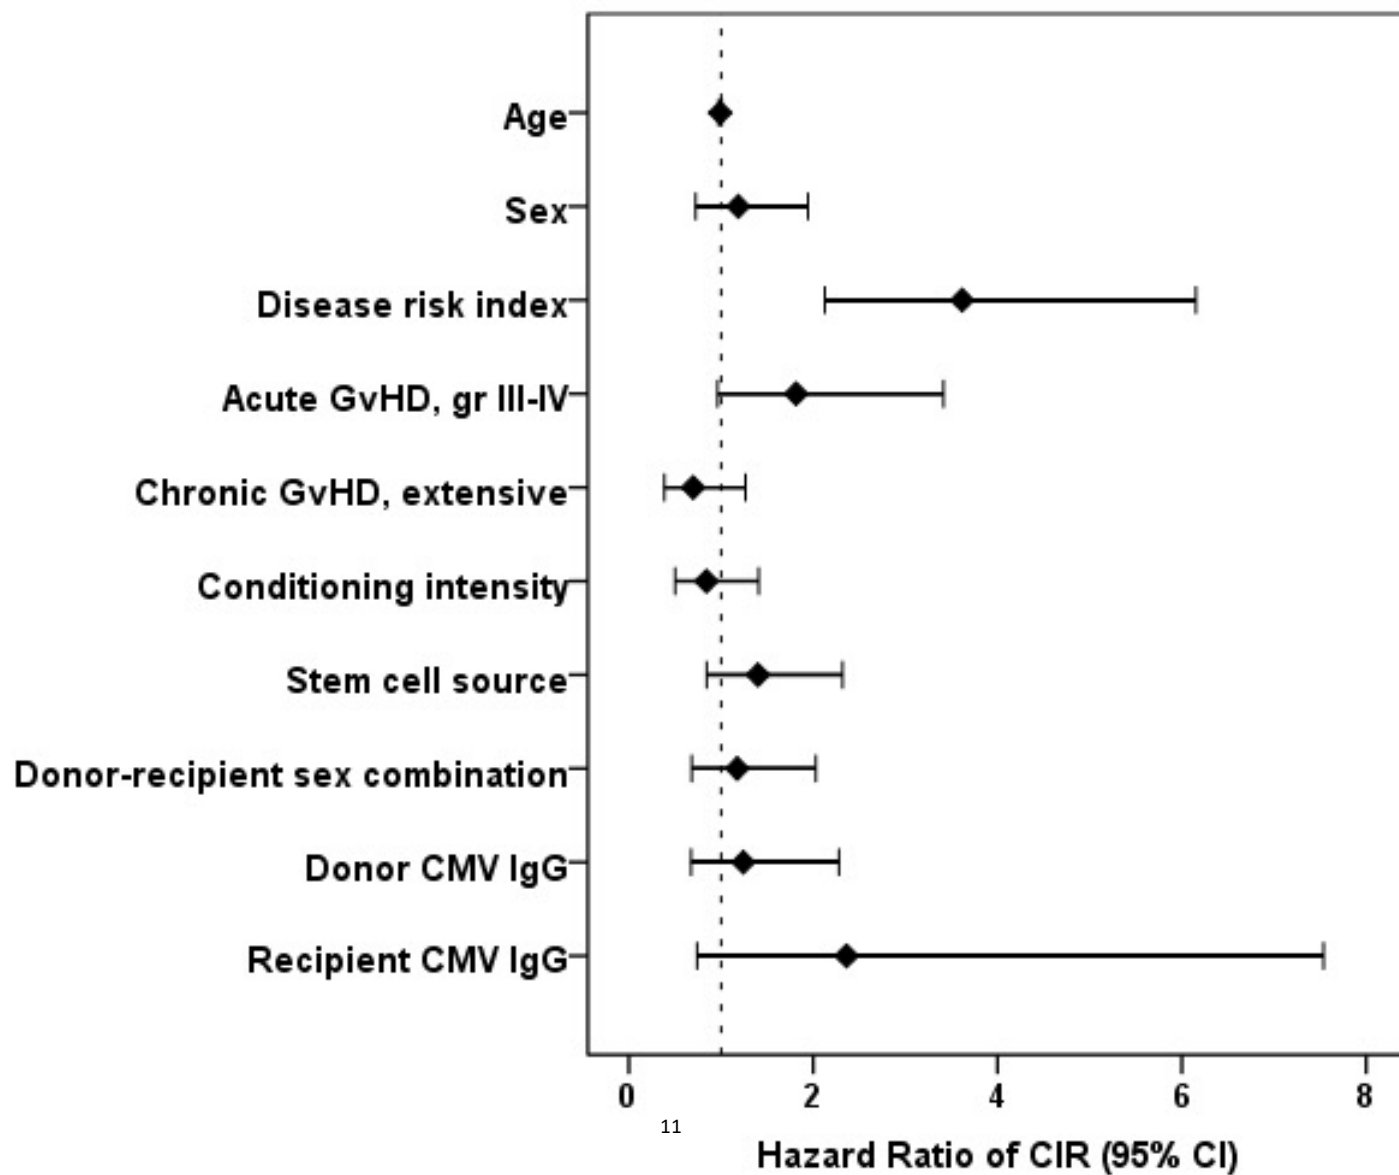

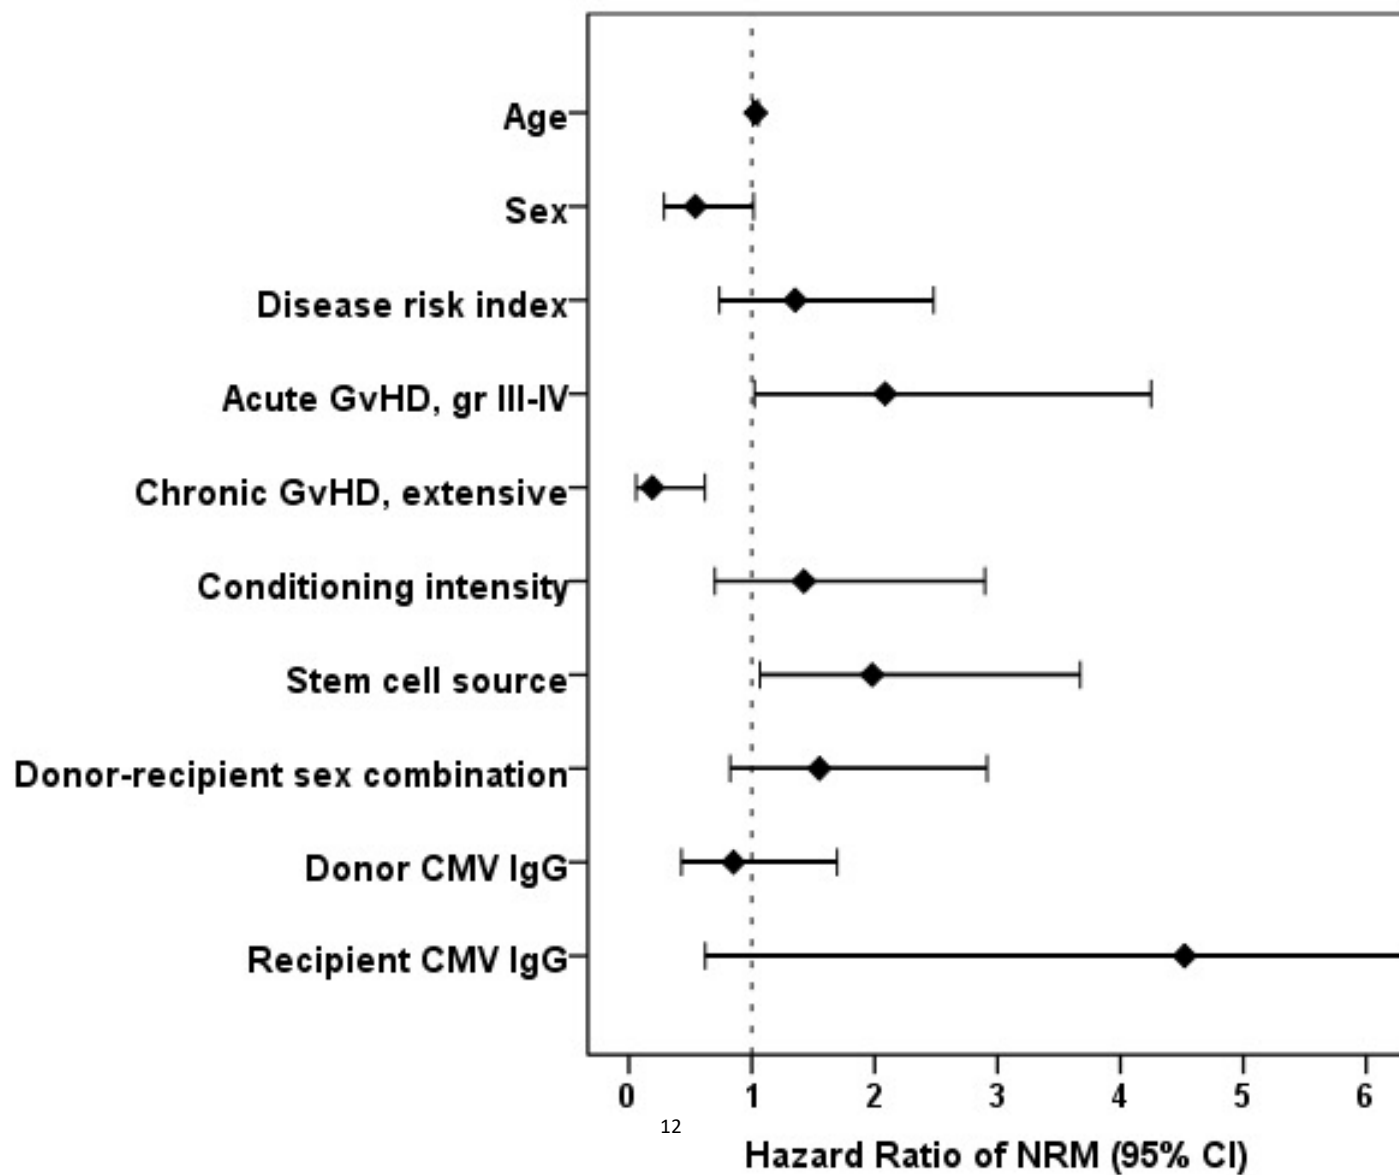

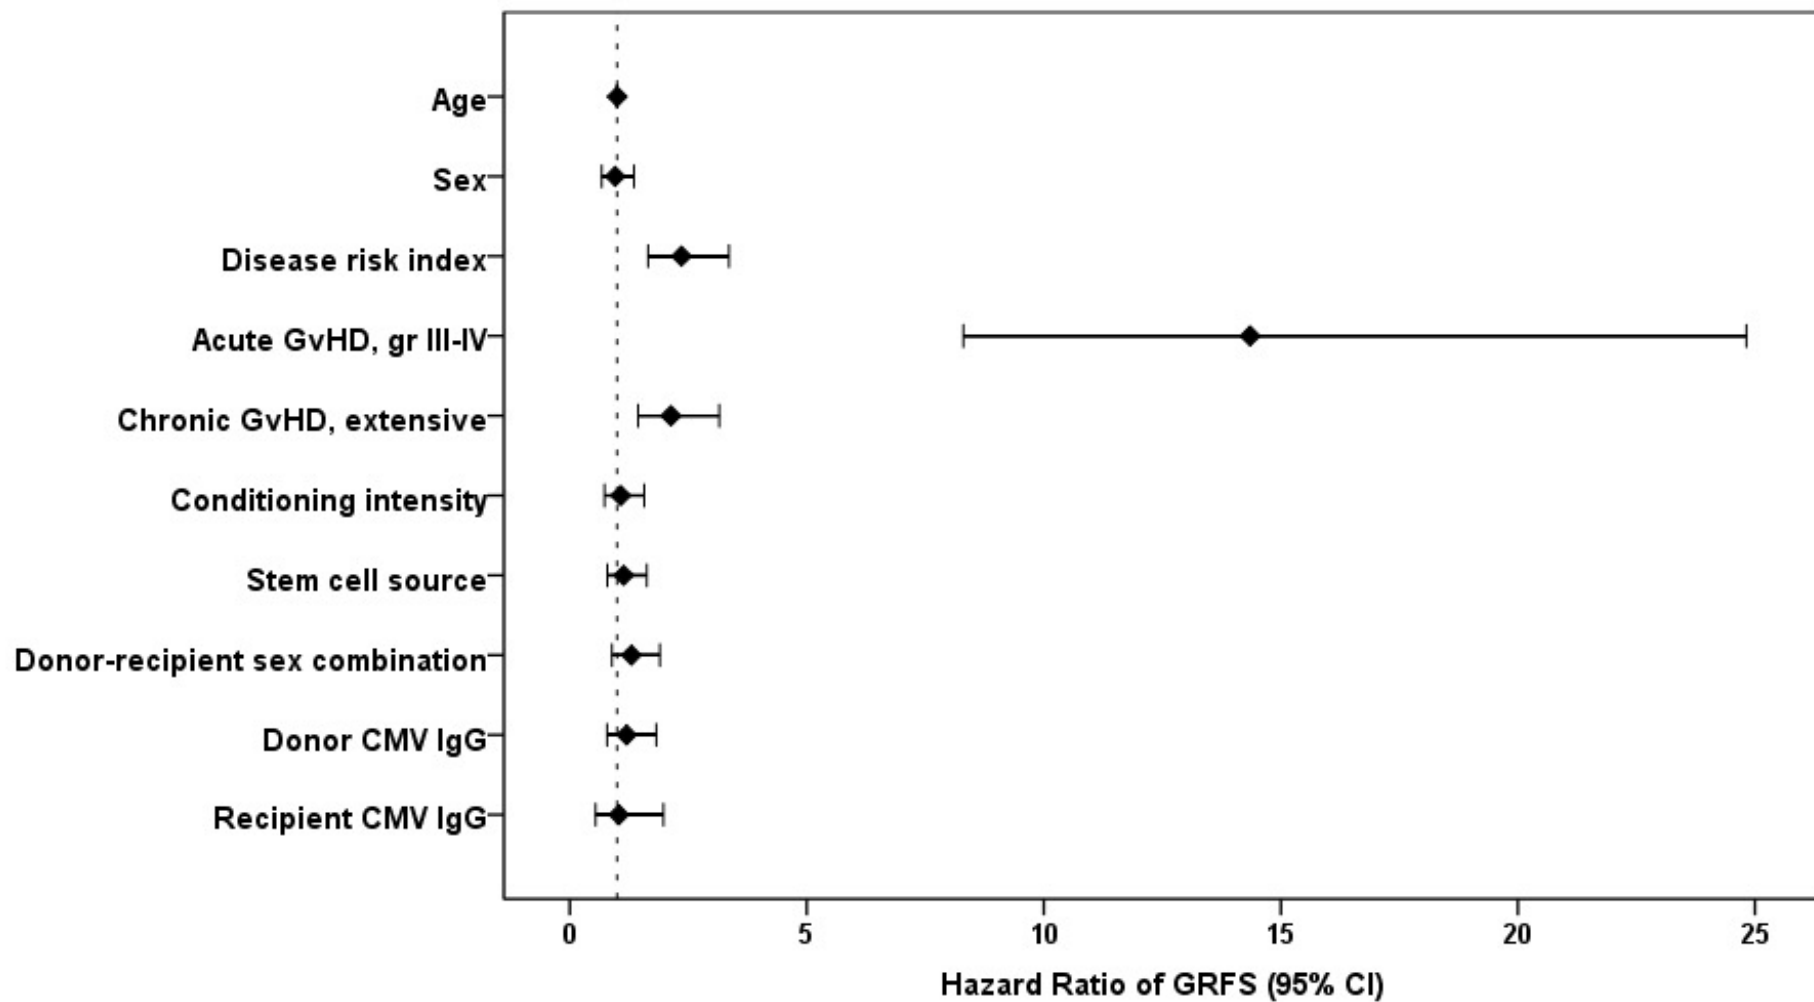

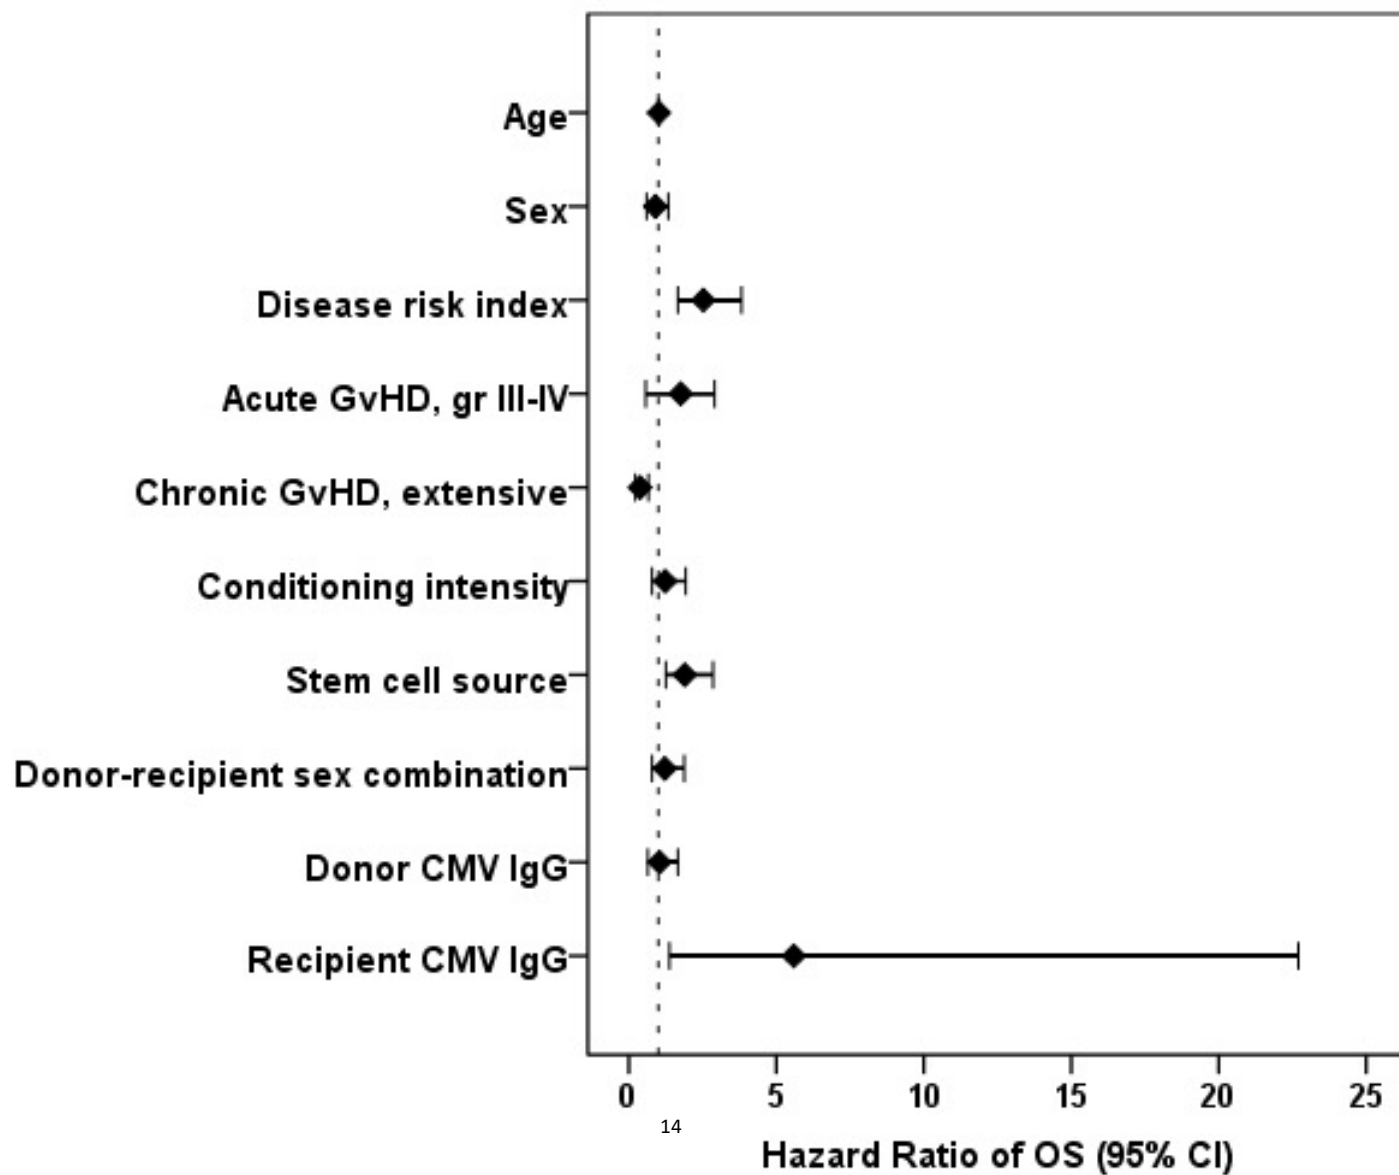

**Supplementary Figure S4A**  
**Low/Intermediate-risk**

**Probability of Nonrelapse Mortality**

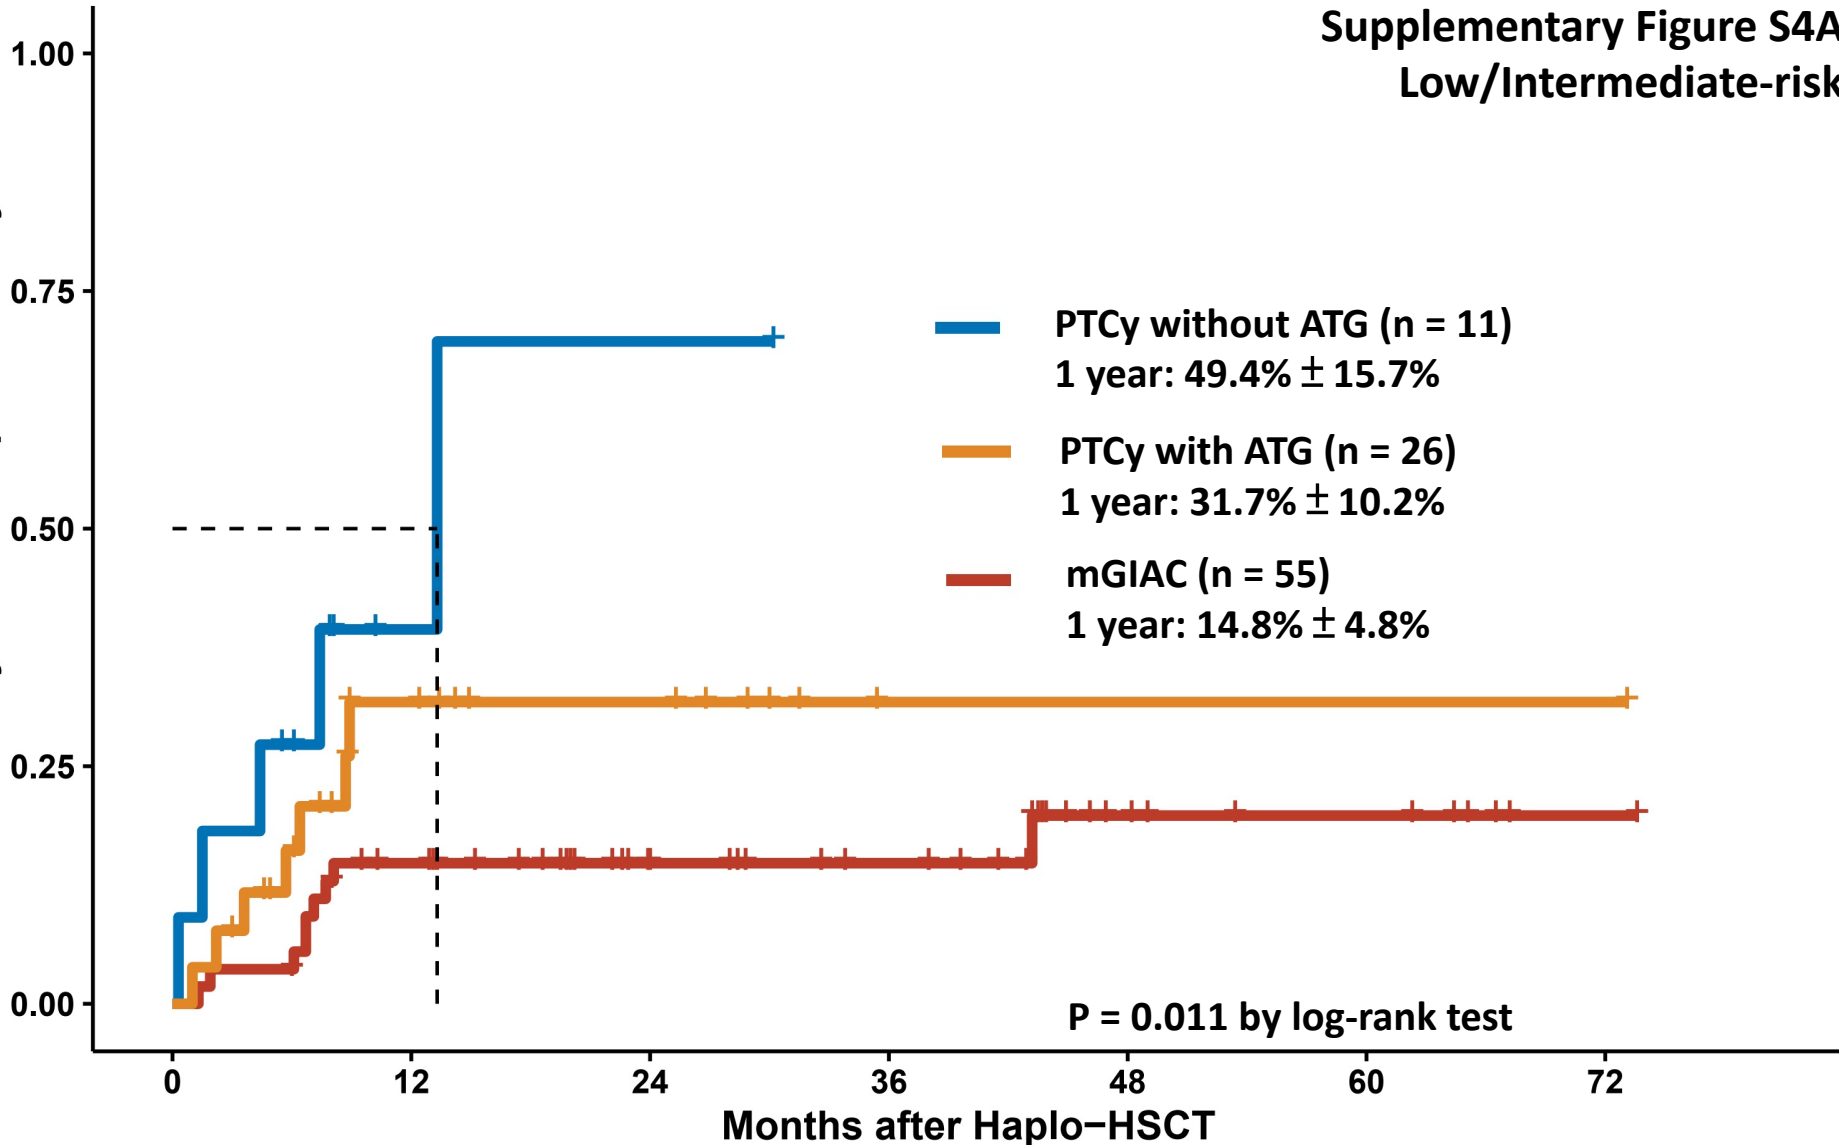

**No. at risk:**

|  |    |    |    |                 |   |   |   |
|--|----|----|----|-----------------|---|---|---|
|  | 55 | 42 | 27 | 21              | 9 | 6 | 1 |
|  | 11 | 2  | 1  | 0 <sub>15</sub> | 0 | 0 | 0 |
|  | 26 | 11 | 7  | 1               | 1 | 1 | 1 |

**Supplementary Figure S4B**  
**Low/Intermediate-risk**

**Cumulative Incidence of Relapse**

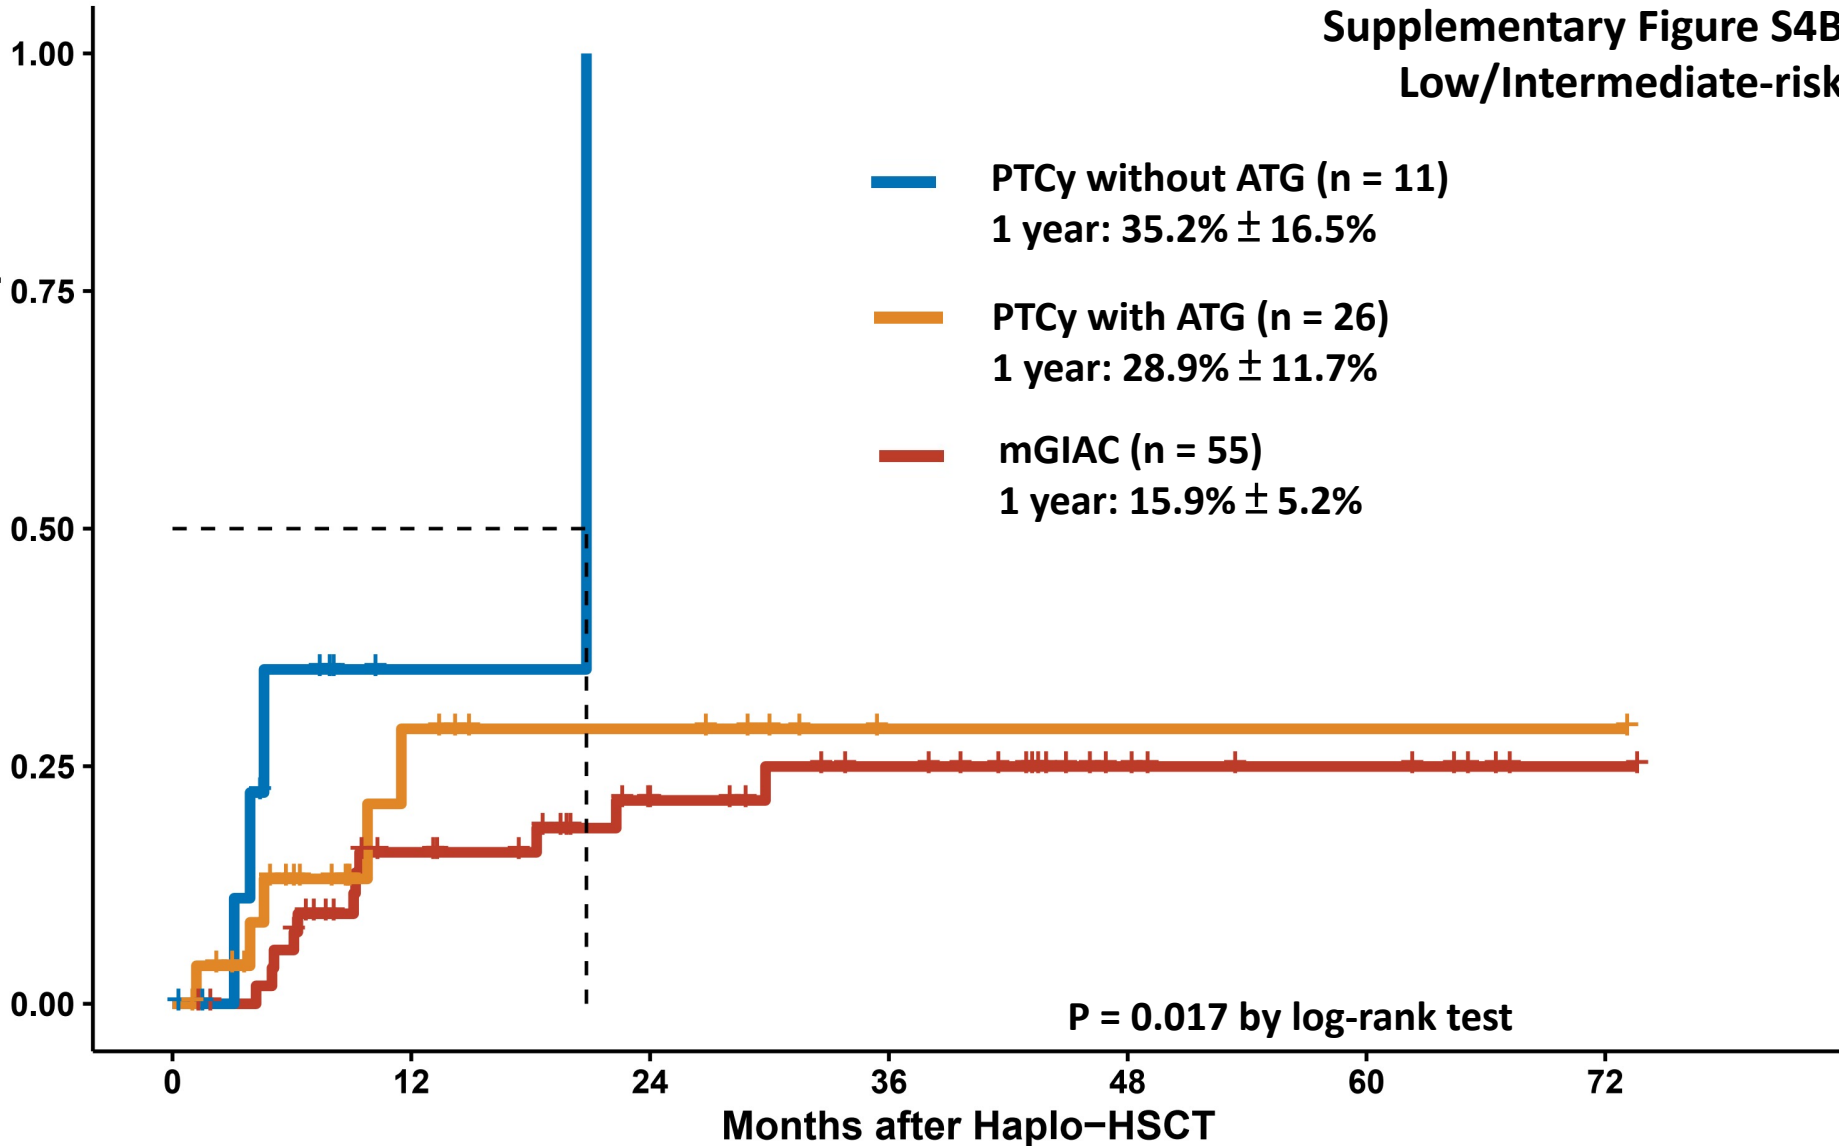

**No. at risk:**

|  |    |    |    |                 |   |   |   |
|--|----|----|----|-----------------|---|---|---|
|  | 55 | 36 | 25 | 19              | 9 | 6 | 1 |
|  | 11 | 1  | 0  | 0 <sub>16</sub> | 0 | 0 | 0 |
|  | 26 | 9  | 6  | 1               | 1 | 1 | 1 |



**Supplementary Figure S5A**  
**High/Very-high-risk**

**Cumulative Incidence of Relapse**

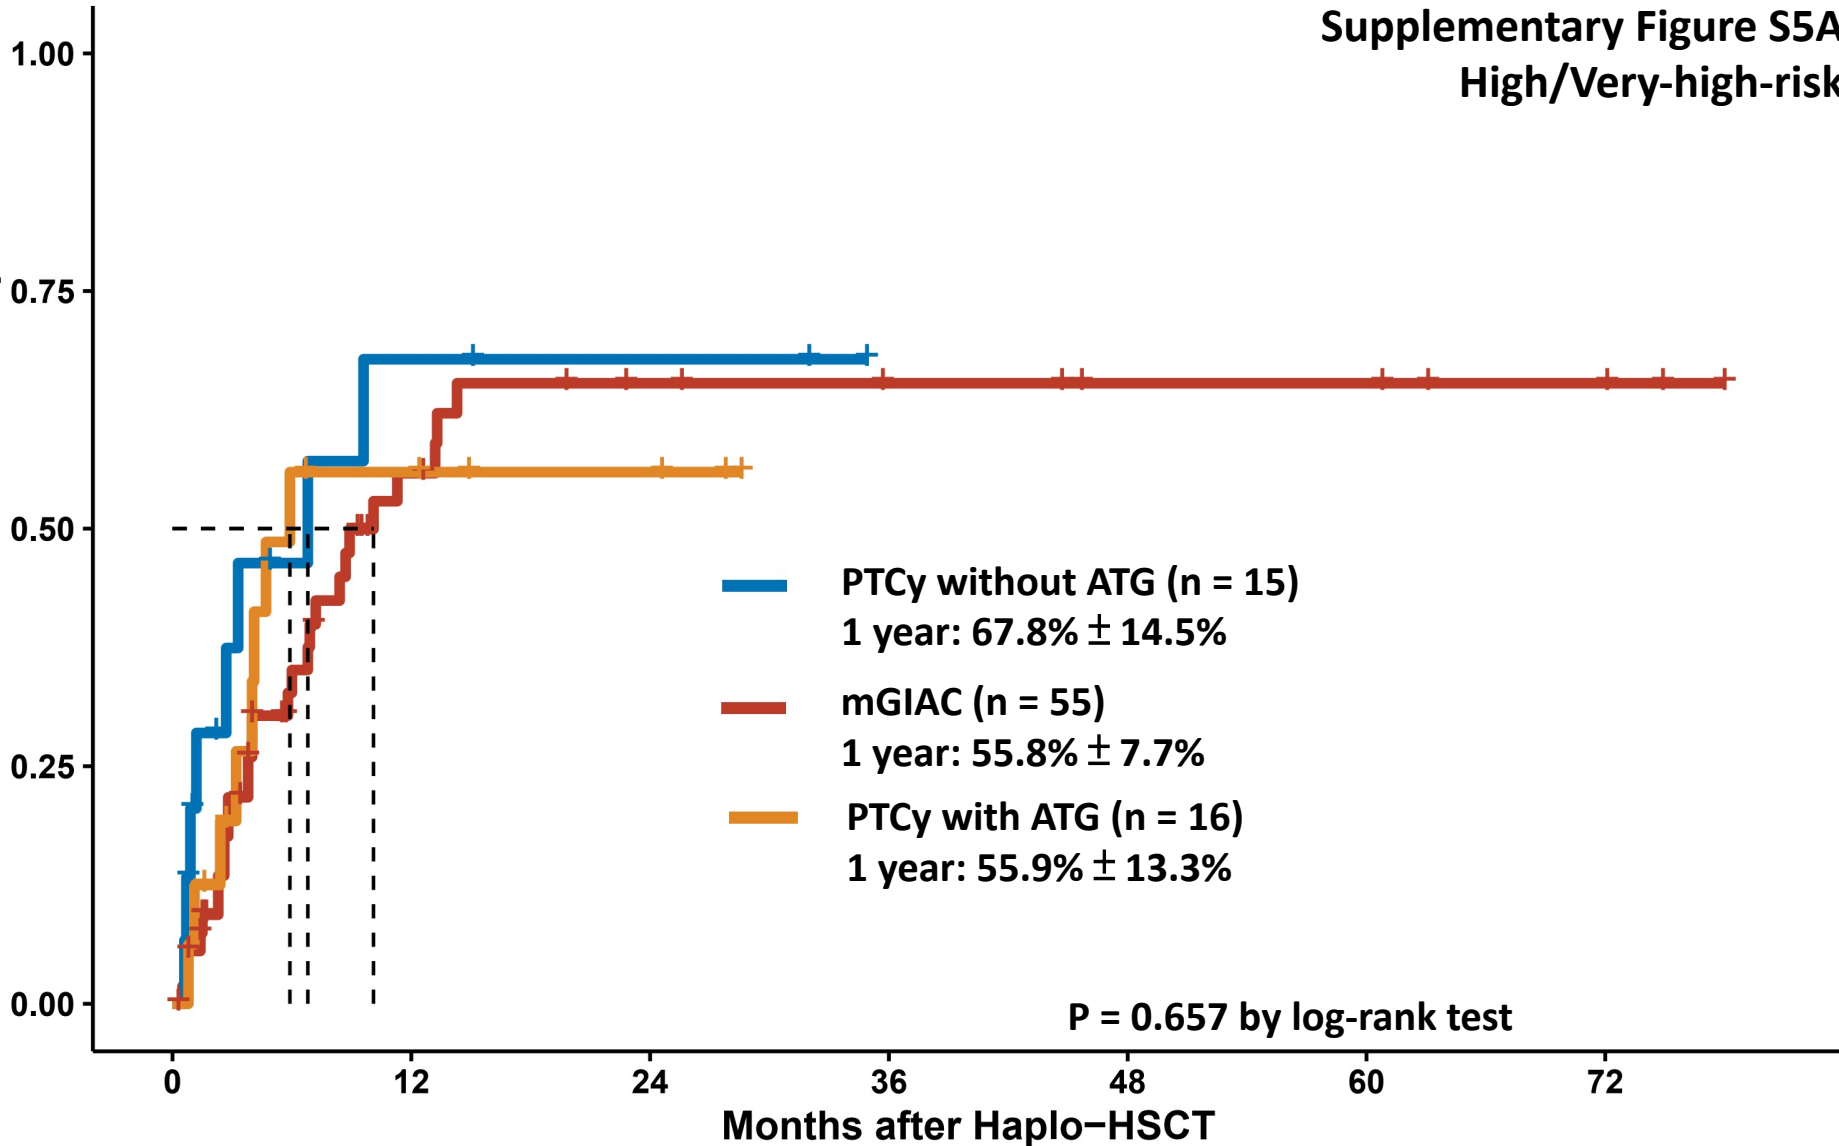

**No. at risk:**

|  |    |    |   |                 |   |   |   |
|--|----|----|---|-----------------|---|---|---|
|  | 55 | 15 | 9 | 7               | 5 | 5 | 3 |
|  | 15 | 3  | 2 | 0 <sub>17</sub> | 0 | 0 | 0 |
|  | 16 | 5  | 3 | 0               | 0 | 0 | 0 |

# Supplementary Figure S5B High/Very-high-risk

Probability of Nonrelapse Mortality

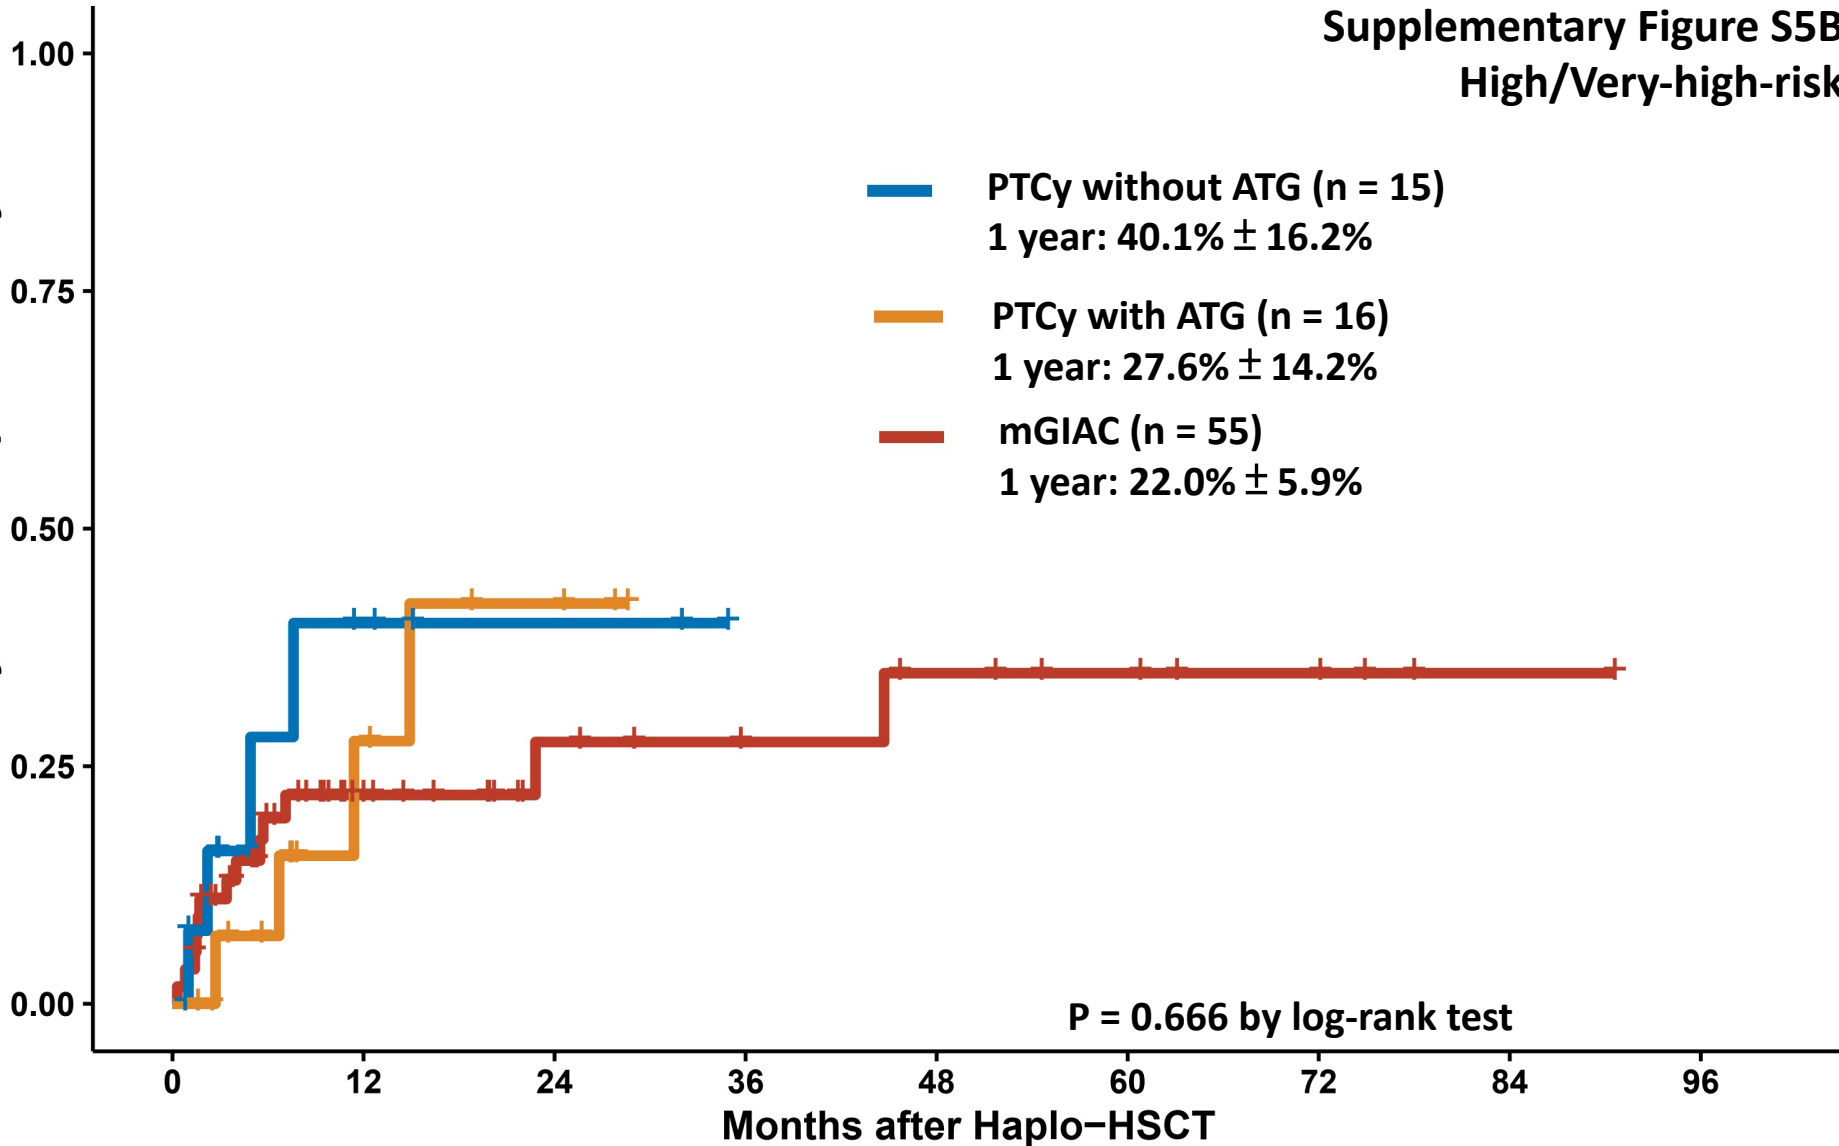

No. at risk:

|  |    |    |    |    |   |   |   |   |   |
|--|----|----|----|----|---|---|---|---|---|
|  | 55 | 24 | 13 | 10 | 8 | 6 | 4 | 1 | 0 |
|  | 15 | 4  | 2  | 0  | 0 | 0 | 0 | 0 | 0 |
|  | 16 | 6  | 3  | 0  | 0 | 0 | 0 | 0 | 0 |
